1 **Full title: A mannitol/sorbitol receptor stimulates dietary intake in *Tribolium***

2 ***castaneum***

3 **Short title: Sweet taste preference in home-stored pest**

4 Tomoyuki Takada<sup>1</sup>, Ryoichi Sato<sup>1</sup>, Shingo Kikuta<sup>1\*</sup>

5

6 <sup>1</sup> Graduate School of Bio-Applications and Systems Engineering, Tokyo University of

7 Agriculture and Technology, Koganei, Tokyo, Japan.

8

9 \*Corresponding author

10 E-mail address: Sincinq@gmail.com (SK)

11

12

13

14 **Abbreviation**

15 ORF, open reading frame; RT, reverse transcription; RNAi, RNA interference; dsRNA,

16 double strand RNA; cRNA, capped RNA; MBS, modified Barth's saline; CBB, Coomassie

17 brilliant blue; Gr, gustatory receptor;

18

19 **Keywords**

20 Gustatory receptor; sugar alcohol; *Xenopus* oocyte expression; gene silencing;

21

22 **Abstract**

23 Perception of chemical stimuli by insects aids in accepting or rejecting food. Gustatory

24 receptors (Grs) regulating external signals in chemosensory organs have been found in

25 many insects. *Tribolium castaneum*, a major pest of stored products, possesses over 200 *Gr*

26 genes. An expanded repertoire of *Gr* genes appears to be required for diet recognition in

27 generalist feeders; however, it remains unclear whether *T. castaneum* recognizes a suite of

28 chemicals common to many products or whether it is attracted to specific chemicals, and

29 whether its Grs are involved in its feeding behavior. It is difficult to determine the food

30 preference of *T. castaneum* based on its dietary intake due to a lack of appropriate  
31 methodology. This study established a novel dietary intake estimation method using  
32 gypsum, designated the TribUTE (*Tribolium Urges To Eat*) assay. *T. castaneum* adults were  
33 fed gypsum block without added organic compounds. Sugar preference was determined  
34 by adding sweeteners and measuring the amount of gypsum in the excreta. Mannitol was  
35 the strongest attractant of *T. castaneum* dietary intake; in addition, TcGr20 was  
36 responsible for mannitol and sorbitol responses in *Xenopus* oocyte expression, but did not  
37 respond to any other non-volatile compounds tested. The EC<sub>50</sub> values of TcGr20 for  
38 mannitol and sorbitol were 72.6 mM and 90.6 mM, respectively, suggesting that TcGr20 is  
39 a feasible receptor for the recognition of mannitol in lower concentrations. *TcGr20* was  
40 expressed in the antennae, where the perception of mannitol would occur. We examined  
41 whether *TcGr20* was involved in mannitol recognition using RNAi and the TribUTE assay.  
42 The amounts of excreta in *TcGr20* dsRNA-injected adults decreased significantly despite  
43 the presence of mannitol, compared to that of the control adults. Taken together, our  
44 results suggest that *T. castaneum* adults recognized mannitol/sorbitol using TcGr20  
45 receptors, thereby facilitating their dietary intake.

## 46 **Introduction**

47           Feeding behavior in insects is comprised of several processes for recognizing  
48 chemical compounds, tasting, continuous feeding, and digestion [1]. Food-acceptance or  
49 food-rejection actions in insects are determined by non-volatile compounds such as  
50 carbohydrates and caffeine contained in host plants [2, 3]. Chemical compounds stimulate  
51 the gustatory receptors (Grs) located in external sensory organs. Stimulated Grs transmit  
52 electrochemical signals through sensory neurons to the sub-esophageal ganglion and  
53 brain, thereby regulating the feeding behaviors of insects [4, 5]. Feeding behaviors differ  
54 across diverse insect species [6]. For example, larval growth of the specialist-feeding  
55 silkworm *Bombyx mori* depends solely on mulberry leaves [7]. *B. mori* perceives some  
56 gustatory stimulants such as sucrose, inositol, morin and  $\beta$ -sitosterol contained in the  
57 mulberry leaves using maxillary palps [8]. *Myo*-inositol, an indispensable nutrient and a  
58 feeding behavior prolonging factor in *B. mori* larvae, was recognized via BmGr10  
59 expression in the sensory organs [9]. Therefore, Grs in specialist feeders play a key role in  
60 detecting specific compounds. Meanwhile, a generalist feeder, *Helicoverpa armigera*,  
61 utilizes a wider range of host plants. Given that generalists feed on various plants and

62 plant products, many types of non-volatile chemical compounds contained in foods may be  
63 sensed by various Grs-expressing sensory organs [10, 11].

64 *Tribolium castaneum*, a major pest of grains, cereals, pasta, chocolates, and nuts  
65 [12, 13], possesses 207 Grs genes available as gene models based on genome analysis [14].

66 Tissue-specific expression analyses have shown that 34 Grs genes in the antennae  
67 associated with the gustatory perception, with many more types of Grs expressed in  
68 antennae than in other insect species [15]. This expanded Gr family likely plays a  
69 functional role for host selection. One pressing question pertains to whether *T. castaneum*  
70 recognizes a suite of chemicals common to many products, or whether it is attracted to  
71 specific chemicals. To answer this question, a dietary intake evaluation of *T. castaneum* is  
72 required using an artificial diet composed of as few compounds as possible. Dietary intake  
73 of *T. castaneum* has been previously examined using dried flour, but this is insufficient for  
74 evaluating preferences since the organic compounds in flour cannot be completely  
75 separated [16, 17]. Therefore, the establishment of a dietary intake assay in an  
76 organic-free state is required. One commonly-used method involves the measurement of  
77 swallowed liquid food composed of sugar and water, such as in the CAFE (Capillary

78 Feeder) assay [18]. However, this method is only applicable for sucking or licking insects.  
79 Because *T. castaneum* prefers dry products with water content less than 12% [17, 19],  
80 CAFE cannot be applied for investigations into its dietary preference. Little is known about  
81 the dietary intake of *T. castaneum* due to the lack of technical methods using dry  
82 compounds. This study developed a novel dietary intake estimation method using gypsum  
83 block without added organics. Since the gypsum eaten by *T. castaneum* adults is eventually  
84 excreted without digestion as waste, the measurement of excreta allows for the  
85 quantification of dietary intake in *T. castaneum*.

86         Additionally, sugar preference can be determined by adding sweeteners to act as a  
87 stimulant for feeding behavior. Sweeteners would act as ligands to stimulate Grs; however,  
88 to date, only few Grs have been identified as ligand-stimulated in the ectopic system in  
89 generalist feeders, including *T. castaneum*. HarmGr4, found in *H. armigera*, responded to  
90 fructose in the *Xenopus* oocyte expression system [11]. Furthermore, the Gr43-like clade in  
91 Gr family including HarmGr4, have been found in various insects such as the Diptera and  
92 Lepidoptera, where they act as receptors of fructose and *myo*-inositol [9, 20]. Since the  
93 Gr43-like genes are also represented in *T. castaneum*, the candidate genes may be

94 stimulated by any sugars/sugar alcohols. Here, we predicted that sweeteners deduced in  
95 the dietary intake assay were potentially ligand stimulators of Gr43-like genes in *T.*  
96 *castaneum*. This study demonstrates ligands of TcGr20 belonging in the Gr43-like gene  
97 family using an exogenous expression system with a two-voltage clamp assay. We also  
98 demonstrate the *in vivo* effect of the combination of RNAi and the dietary intake assay.

99

## 100 **Materials and methods**

### 101 **Insects**

102 Red flour beetles (*Tribolium castaneum* Herbst.) were obtained from Sumica  
103 Technoservice Co. (Hyogo, Japan) and reared on whole-wheat flour (Pioneer-kikaku,  
104 Kanagawa, Japan) and yeast (Saf-instant®, Lesaffre, Marcq-en-Baroeul, France). They were  
105 maintained at  $29 \pm 1^\circ\text{C}$  under a 16 L:8 D cycle.

106

### 107 **Total RNA preparation and cDNA synthesis**

108 Total RNA was isolated from the antennae and proboscis of 20 adults using  
109 ISOGEN II (NIPPON GENE, Tokyo, Japan) following the manufacturer's instructions. cDNA

110 was synthesized from total RNA by ReverTra Ace® (TOYOBO, Osaka, Japan) using Oligo-dT  
111 primers. Primer sequences are shown in S1 Table. The cDNA transcription reaction was  
112 performed at 42°C for 90 min to produce cDNA and 99°C for 5 min to denature the  
113 enzymes. Open reading frames (ORF) of *TcGr20*, *TcGr21*, *TcGr27* and *TcGr28* were  
114 amplified from cDNA by PCR using a high-fidelity DNA polymerase, PrimeSTAR® HS  
115 (TaKaRa Bio, Shiga, Japan) with specific primers containing restriction enzyme sites at 5' and  
116 and 3' ends of ORF (S1 Table). Kozak sequences were inserted between restriction sites  
117 and primer binding sites to enhance translational efficiency. PCR reactions were  
118 performed as follows: 35 cycles of denaturation at 98°C for 30 s, annealing at 55°C for 15 s,  
119 and extension at 72°C for 70 s. *TcGr20*, *TcGr21*, *TcGr27* and *TcGr28* were directly  
120 subcloned into expression vector pT7XbG2 (DDBJ accession number, AB255037) and the  
121 sequence analyses were performed by Eurofins Genomics (Tokyo, Japan) to confirm the  
122 correctness of the construct. Sequence data were analyzed using FinchTV sequence  
123 scanner software.

124

## 125 **Quantitative RT-PCR**



126 Total RNA was isolated from male and female adults (n = 20) with ISOGEN II  
127 (NIPPON GENE, Tokyo, Japan) following the manufacturer's instructions. Gene expression  
128 levels were examined in various tissues: antennae, heads (without antennae but including  
129 mouthparts), thorax, abdomen and legs. First-strand cDNA was synthesized using a  
130 PrimeScript™ RT reagent Kit (TaKaRa Bio) following the manufacturer's instructions. The  
131 quality and concentration of synthesized cDNA were measured using a NanoPhotometer®  
132 NP80 (Implen, München, Germany). Quantitative RT-PCR was performed using SYBR®  
133 Premix *Ex Taq*™ II (Tli RNaseH Plus, TaKaRa Bio) with a StepOnePlus™ (Thermo Fisher  
134 Scientific, Carlsbad, CA) under the following conditions: a holding cycle at 95°C for 10 min,  
135 followed by 40°C cycling stage of 95°C for 15 s, 60°C for 1 min, and melting curve stages  
136 were carried out at 95°C for 15 s and 60°C for 1 min to confirm the presence of nonspecific  
137 PCR reactions. Relative expression levels were calculated using  $\Delta\Delta C_t$ . The *TcGr20*  
138 expression levels in tissues were normalized using the expression levels of *T. castaneum*  
139 ribosomal protein S3 (*RpS3*, NCBI accession: NM\_001172392.1). *RpS3* was used as a  
140 housekeeping gene due to the expression stability through the stage from larvae to adult  
141 [21, 22]. Primer sequences are shown in S2 Table.

142

143 **Capped RNA synthesis and two-electrode voltage clamp**  
144 **electrophysiology**

145           Procedures followed those described in a previous study [9]. Briefly, capped-RNA  
146 (cRNA) were synthesized using mMACHINE<sup>®</sup> T7 kit (Thermo Fisher Scientific)  
147 according to the manufacturer's instructions, and were kept at  $-80^{\circ}\text{C}$  until use. The cRNA  
148 injected oocytes were incubated in modified Barth's saline (MBS) buffer supplemented  
149 with 10 mg/mL penicillin and streptomycin for 3 days at  $20^{\circ}\text{C}$  [23]. Water-injected  
150 oocytes, which had endogenous receptor activities alone, were used as negative controls.  
151 Whole-cell current was recorded with two-electrode voltage clamp in a perfusion system  
152 using Ringer's solution [9]. Current was amplified with an OC-725C amplifier (Warner  
153 Instruments, Hamden, CT, USA) at a holding potential of  $-70$  mV, low-pass filtered at 50  
154 Hz, and digitized at 1 kHz. Data was acquired by software pCLAMP<sup>™</sup> 10 (Molecular  
155 Devices, Sunnyvale, CA). Dose-dependent response curves were fitted to a hill slope curve  
156 using Prism 6 software (GraphPad, San Diego, CA).

157

## 158 **Evaluation of dietary intake**

159           We developed a novel feeding application for *T. castaneum* adults using gypsum  
160 containing a near-zero amount of organic compounds instead of artificial diets and wheat,  
161 termed a TribUTE (*T*ribo*l*ium *U*rges *T*o *E*at) assay. The artificial gypsum diets were  
162 comprised of dry powder and water mixed in a ratio of 1.3:1 (w/w) containing 200 mM  
163 sugars or sugar alcohol solutions. The mixed gypsum was allowed to solidify completely at  
164 65°C for 48 h. *T. castaneum* adults were starved for one week in the absence of foods and  
165 held in cages at 25°C. Each gypsum block of approximately 5 mm was provided to  
166 individual adult beetles in a 24-well microplate. They were kept for 48 h at 25°C. The  
167 eaten gypsum by *T. castaneum* adult was eventually excreted without digestion as a waste,  
168 permitting the measurement of the amount of gypsum. The excrements of the artificial  
169 gypsum diet were collected in 200 µL microtubes by using a thinning silicon wire under a  
170 stereoscopic microscope. The excreta were dissolved with 50 µL deionized water to  
171 remove sugars or sugar alcohols, and then the precipitate of gypsum was dried thoroughly  
172 at 65°C for 24 h. Excreta were weighed by microbalance (AT201, Mettler-Toledo, OH).

173

## 174 **RNA interference**

175           To silence the gene expression of *TcGr20* in adults, we synthesized

176 double-strand (dsRNA) *in vitro* using MEGAscript® T7 RNAi kit (Thermo Fisher Scientific)

177 according to the manufacturer's instructions. Primers sequences are shown in S3 Table.

178 The dsRNA at 1 µg/µL was kept at -80°C until use. A 150–200 nL volume of dsRNA was

179 injected between the internode of head and thorax in adult beetles using a capillary needle,

180 Nanoject II (Drummond Scientific Company, Broomall, PA) on a cooling block at -10°C.

181 Emerald luciferase (*Eluc*, TOYOBO, Osaka, Japan) was used as a negative control. The

182 similar sequences of *Eluc* were searched in NCBI *Tribolium* genome (ID:216). Since the

183 over 22-bp identical sequences of *Eluc* and *TcGr20* could potentially function as false

184 targets, these sequences were trimmed from the dsRNA regions. The dsRNA-injected

185 adults were kept at 25°C. Adult beetles were used for the TribUTE assays and quantitative

186 RT-PCR at 48 h after injections.

187

## 188 **Results**

### 189 **Identification of feeding promoting stimulants in *T.***

#### 190 ***castaneum***

191 We found that *T. castaneum* adults consumed gypsum block in the absence of organic  
192 compounds (Fig 1A). To discriminate gypsum excreta from conventional excreta derived  
193 from wheat flour, gypsum block stained with Coomassie Brilliant Blue (CBB) R-250 (Wako,  
194 Osaka, Japan) was given to adult beetles (Fig 1A). We visualized the digestive tract from  
195 the foregut to the anus under a microscope, and found that the tract was partially stained  
196 by CBB (Fig 1B), while the tract was not stained using gypsum without CBB (Fig 1B'). The  
197 excreta of the stained gypsum were also observed (Fig 1C). Together, these findings  
198 showed that *T. castaneum* adults recognized and fed on gypsum, and excreted it as a waste.  
199 We then attempted to identify feeding-promoting stimulants for *T. castaneum*. We  
200 produced gypsum blocks containing mono-, di-, and tri-saccharides or sugar alcohols as  
201 candidates. As the amount of excreta with these additives was higher than the amount  
202 produced from sugar-free gypsum, we assumed that *T. castaneum* recognized sugars and  
203 sugar alcohols as attractants. *T. castaneum* actively fed on gypsum with added

204 sugars/sugar alcohols, and excreted the gypsum as a waste. The amount of excreted  
205 sweetened gypsum was significantly greater than gypsum without sweetener (Fig 1D).  
206 Additionally, gypsum with 200 mM galactose and sucrose yielded a negligible and  
207 non-significant difference compared to gypsum without sweeteners (Fig 1D). The amount  
208 of excreta was markedly greater in the presence of 200 mM mannitol, demonstrating that  
209 feeding behavior was stimulated based on the sweetener itself. These findings indicate  
210 that mannitol acts as a strong attractant for *T. castaneum*.

211

212 **Fig 1. Establishment of feeding assay in *T. castaneum* adults using gypsum block.**

213 The starved *T. castaneum* adults show in a series of the behavior from recognition, eating  
214 to excretion the gypsum diet. Scale bars: 1 mm. **A.** The adults bit gypsum. The gypsum was  
215 stained with Coomassie Brilliant Blue (CBB). **B, B'.** Digestive tract of adult beetle with the  
216 CBB staining gypsum (**B**) and without the CBB staining (**B'**). **C.** Excreta of the CBB staining  
217 gypsum by *T. castaneum* (arrowheads). **D.** The effect of gypsum intake with sugar or sugar  
218 alcohol mixture. Each sugar/sugar alcohol at 200 mM was contained in the gypsum block.  
219 *T. castaneum* adults fed on the artificial diet for 48 h. The amount of excretion was

220 measured using microbalance. Each plot represents the amount of excreta of adult beetles  
221 in individuals (n = 4–10). Standard error bars show S.E.M. Statistical analyses were  
222 performed one-way ANOVA and the post hoc Tukey’s multiple comparison test (“\*\*”  
223 P<0.01, “\*\*\*” P<0.001, “\*\*\*\*” P<0.0001, “ns” no significant). Fructose, Fru; glucose, Glu;  
224 galactose, Gal; sucrose, Suc; maltose, Mal; trehalose, Tre; mannitol, Man; sorbitol, Sor.

225

226

## 227 **Phylogenetic analysis of insect Grs**

228 Mannitol, a sugar alcohol, acts as a sweetener for vertebrate chemosensation [24],  
229 and other sugar alcohols are readily recognized by insect species. In *B. mori*, sugar  
230 alcohols such as *myo/epi*-inositol were recognized by the gustatory receptor BmGr10  
231 belonging to the Gr43-like clade [9]. We aimed to identify homologous genes in *T.*  
232 *castaneum* belonging to the same clade as BmGr10 based on the phylogenetic analyses  
233 using amino acid residues. The phylogenetic tree of the insect Grs was constructed using  
234 neighbor-joining (Fig 2). TcGr20, 21, and 25–28 belonged to the clade including the  
235 DmGr43a fructose receptor derived from *Drosophila melanogaster*, the BmGr9 fructose

236 receptor and BmGr10 *myo/epi*-inositol receptors derived from *B. mori*, and the HarmGR4  
237 fructose receptor derived from *Helicoverpa armigera* [9, 11, 20]. On the basis of these  
238 results, we hypothesized that mannitol receptors belonged to the TcGr20, 21, and 25–28  
239 groups.

240

241 **Fig 2. Phylogenetic analysis of deduced amino acid sequences of Gr43-like genes.**

242 Amino acid sequence alignment was generated using ClustalW, and a rooted tree of insect  
243 Grs was conducted by neighbor-joining method in MEGA ver. 7 [43]. The percentage of  
244 replicate trees are shown in the associated taxa clustered together in the bootstrap test of  
245 500 replicates. The scale bar represents 0.2 substitutions per amino acid site. Amino acid  
246 sequences of *B. mori* and *T. castaneum* Grs were obtained from [14, 44], respectively. The  
247 other amino acid sequences, AmGr3 derived from *Apis mellifera*, HarmGr4 from  
248 *Helicoverpa armigera*, DmGr43 and DmGr66a derived from *Drosophila melanogaster*, were  
249 obtained from the NCBI public database.

250

251



## 252 **TcGr20 is a mannitol/sorbitol receptor**

253 We attempted to amplify the ORF in the *TcGr20*, *21*, and *25-28* genes for  
254 subcloning into the *Xenopus* oocyte expression vector. However, we failed to obtain PCR  
255 products of *TcGr25* and *26* from any cDNA produced from any sampled tissues and stages.  
256 Hence, we analyzed the biochemical functions of TcGr20, 21, 27 and 28 using  
257 electrophysiological analysis. Two-electrode voltage-clamp recording was performed in  
258 accordance with a previous study [9]. We reconfirmed a BmGr10 response to *myo*-inositol  
259 using a two-electrode voltage clamp as a positive control (S1 Fig). Each *TcGr20*, *21*, *27* and  
260 *28*-expressing oocyte was clamped with electrode capillaries filled with 3 M KCl. When  
261 mannitol was added to the perfusion chamber, an inward current was observed in  
262 *TcGr20*-expressing oocytes (Fig 3A), but not in *TcGr21*-, *TcGr27*- or *TcGr28*-expressing or  
263 water-injected oocytes (Fig 3B, S2 Fig). TcGr20 also responded to sorbitol but not the  
264 other sugars (Fig 3A). We did not observe a current response in *TcGr21*, *27* or  
265 *28*-expressing oocytes for any sugars/sugar alcohols tested. The  
266 mannitol/sorbitol-induced currents observed in TcGr20 expressing oocyte were  
267 concentration-dependent to 20-200 mM mannitol and 40-230 mM sorbitol (Fig 4A, 4B).

268 Based on the dose-response curves, the EC<sub>50</sub> value of mannitol and sorbitol were 72.6 ±  
269 9.1 mM and 90.6 ± 10.4 mM, respectively (Fig 4C, 4D). This result suggests that TcGr20  
270 functions as a mannitol/sorbitol receptor.

271

272 **Fig 3. Current recording of *Xenopus* oocytes expressing TcGr20.**

273 **A.** Inward current response of *Xenopus* oocytes expressing TcGr20 to candidate tastants  
274 (arrowheads). Tastants were tested at 200 mM. **B.** The current of water-injected oocytes  
275 to same tastants were also recorded. The current data are representative of recordings  
276 independently performed in several times.

277

278 **Fig 4. Ligand dose-dependent response of TcGr20.**

279 Two-electrode voltage clamp recordings of TcGr20-expressing *Xenopus* oocytes. **A-B.**  
280 Inward current response of TcGr20-expressing oocytes with a range of 20 to 400 mM  
281 mannitol (**A**), and 40 to 230 mM sorbitol (**B**). Each arrowhead represents various  
282 concentrations. **C-D.** Curves were fitted with a standard slope, and EC values were

283 calculated for mannitol (C) and sorbitol (D), respectively. Data are shown as mean  $\pm$  S.E.M.

284 (n = 3).

285

286

## 287 **Tissue expression of *TcGr20***

288 Previous studies have shown that *TcGr20* is predominantly expressed in the  
289 antennae with RNA sequencing and *in situ* RT-PCR [15, 25]. Our findings here confirm that  
290 *TcGr20* is mainly expressed in the antennae (Fig 5), as well as in head structures including  
291 the mouthparts, and in the thorax, abdomen, and legs in both males and females. *TcGr20*  
292 was highly expressed in antennae in both male and female adults (Fig 5A, 5B). *TcGr20* on  
293 the antennae likely acts as sensors for mannitol and sorbitol.

294

### 295 **Fig 5. Tissue expression of *TcGr20*.**

296 The relative expression level of the *TcGr20* in different tissues was determined by  
297 quantitative RT-PCR. *TcGr20* expression in male (A) and female (B). An, antennae; H, head;  
298 T, thorax; Ab, abdomen and L, legs. Relative expression was calculated using  $\Delta\Delta C_t$  method.

299 Ribosomal protein S3 (*RpS3*) in *T. castaneum* was used as the control to normalize the

300 amount of templates. Data are shown as mean  $\pm$  S.E.M. (n = 3).

301

302

### 303 **Effect of mannitol/sorbitol concentrations in the dietary**

#### 304 **intake assay**

305 We measured the dietary intake of *T. castaneum* adult beetles using gypsum containing

306 mannitol or sorbitol at various concentrations (Fig 6). The dietary intake increased in the

307 presence of 100 mM mannitol (Fig 6A) and 200 mM sorbitol (Fig 6B), respectively. The

308 amount of gypsum excreta in individuals at 48 h was  $0.6 \pm 0.07$  mg for 100 mM mannitol,

309 and  $0.26 \pm 0.03$  mg for 200 mM sorbitol (Fig 6). These results indicate that mannitol

310 stimulates a feeding response even at lower concentrations, promoting dietary intake by

311 the beetles.

312

313 **Fig 6. Concentration response of mannitol and sorbitol in TribUTE assay.**

314 The dose effect of gypsum intake with sugar alcohol mixture. **A**, mannitol; **B**, sorbitol.

315 Sugar alcohols at various concentrations were contained in the gypsum block. *T.*

316 *castaneum* adults fed on the gypsum for 48 h. The amount of excreta was measured using

317 microbalance. Scatter plot represents the amount of excretion of adult beetles in

318 individuals (n = 5–7). Standard error bars show S.E.M. Statistical analyses were performed

319 one-way ANOVA and the post hoc Tukey’s multiple comparison tests (“\*\*” P<0.01, “\*\*\*”

320 P<0.001, “ns” no significant).

321

322

### 323 **Evaluation of dietary intake in *TcGr20*-silencing *T.***

#### 324 ***castaneum***

325 Our results showed that *T. castaneum* fed on gypsum in the presence of mannitol (Fig 6A),

326 and that TcGr20 was a mannitol receptor (Fig 3A). We therefore next investigated

327 whether TcGr20 was involved in mannitol recognition for feeding. One promising

328 approach for validating gene function, RNA interference (RNAi), was effective in *T.*

329 *castaneum* [26]. We injected *TcGr20* double-strand RNA (dsRNA) into *T. castaneum* adults;

330 as a result, *TcGr20* expression was significantly suppressed compared with that of *emerald*  
331 *luciferase (Eluc)*-dsRNA injected adults (Fig 7A). Using the *TcGr20* dsRNA-injected adult  
332 beetles, we evaluated the dietary intake of gypsum in the presence of 100 mM mannitol.  
333 The amounts of excreta from *TcGr20* dsRNA-injected adults significantly decreased in the  
334 presence of 100 mM mannitol compared in comparison to that of *Eluc* dsRNA-injected  
335 adults (Fig 7B). These results indicate that *TcGr20* RNAi is an effective tool, and that  
336 *TcGr20* is responsible for mannitol recognition *in vivo*.

337

338 **Fig 7. TribUTE assay in *TcGr20*-silencing *T. castaneum*.**

339 **A.** Knockdown of *TcGr20* by using the injection of the dsRNA into the starved adult beetles.  
340 The *Eluc*-dsRNA was injected as a control. *TcGr20* expression levels of whole body were  
341 examined at 48 h after the dsRNA injection. Standard error bars show S.E.M. Statistical  
342 significance was determined by *t*-test ( $P = 0.0006$ ). **B.** Effect of gypsum intake in the  
343 presence of 100 mM mannitol. The gypsum in the presence of 100 mM mannitol was given  
344 to the *TcGr20*- and *Eluc*-dsRNA-injected adult beetle individuals at 48 h after dsRNA  
345 injection, respectively for 48 h. Amount of gypsum was measured as excretes. Each plot

346 represents the amount of excreta of adult beetles in individuals ( $n = 24$ ). Standard error

347 bars show S.E.M. Statistical significance was determined by *t*-test (“\*\*\*\*” $P < 0.0001$ ).

348

349

## 350 Discussion

351 Our results demonstrate that mannitol acts as a significant feeding attractant in *T.*

352 *castaneum* adult beetles, and that *TcGr20* is responsible for mannitol/sorbitol recognition

353 and the promotion of dietary intake.

354 Gustatory receptor (Gr)-expressing chemosensory organs are involved in external

355 non-volatile compound recognitions. Antennae and legs recognize sucrose in *Tribolium*

356 *brevicornis* in electrophysiological analyses [27]. In *H. armigera*, the fructose receptor

357 HarmGr4 in the antenna recognized fructose [11]. Hence, *TcGr* genes expressed in

358 antennae or legs were hypothesized as being involved in the perception of mannitol as an

359 external signal. In the present study, we used qRT-PCR analysis to show that *TcGr20* was

360 expressed in the antennae. Previous analyses such as tissue-specific RNA-seq and *in situ*

361 PCR have also shown that *TcGr20* is expressed in the antennae [15, 25], and our results are

362 consistent with these findings. We observed a difference in *Gr* expression levels between  
363 males and females [28], implying the occurrence of sex-specific feeding behavior. However,  
364 we observed no difference in *TcGr20* expressions between the sexes (Fig 5).

365         Electrophysiological analyses using *Xenopus* oocytes showed that *TcGr20*  
366 contributes to responses to mannitol and sorbitol (Fig 3). The  $EC_{50}$  values of *TcGr20* for  
367 these sugar alcohols showed that the mannitol response was 0.8 times more sensitive than  
368 the sorbitol response. Additionally, the dietary intake of *T. castaneum* adult beetles in the  
369 TribUTE assay was also more sensitive to mannitol than sorbitol (Fig 6). Mannitol  
370 response was significant at 100 mM, while the significance of sorbitol response was  
371 observed at 200 mM (Fig 6), indicating that the concentration response of mannitol  
372 appears to be correlated with that of *TcGr20* response levels in the electrophysiological  
373 analysis. It is likely that *TcGr20* mainly regulates mannitol recognition in the gustatory  
374 organs. We also examined whether *TcGr20* is involved in mannitol recognition using RNAi  
375 and the TribUTE assay. To explore effective RNAi in *T. castaneum*, *TcGr20*-dsRNA was  
376 injected into pupae; however, the *TcGr20* expression levels in *TcGr20*-dsRNA-injected  
377 adult beetles after eclosion showed a negligible difference compared to those injected with



378 *Eluc*-dsRNA injection (S3 Fig). The 6–9-day period of pupal development prior to  
379 adulthood [29] may have decreased the gene silencing effect. To test this possibility, we  
380 attempted dsRNA injection into starved adult beetles. The test showed a significant RNAi  
381 silencing effect (Fig 7A). Using the *TcGr20* RNAi beetles (Fig 7A), we showed that TcGr20  
382 is responsible for mannitol recognition-dependent dietary intake behavior (Fig 7B). The  
383 attraction of *TcGr20*-dsRNA-injected beetles to the gypsum block appeared to decrease in  
384 the presence of 100 mM mannitol, resulting in a decrease in gypsum intake. It is important  
385 to note that the silencing effects of RNAi were obtained temporarily. TcGr20 responds to  
386 both mannitol and sorbitol, but these dietary intake assays should be further confirmed  
387 using other methods such as the clustered regularly interspaced short palindromic repeats  
388 (CRISPR)/Cas9 system.

389         In *T. castaneum*, six *TcGr* genes in the *Tribolium* genome (NCBI public data, ID:  
390 216) were found as the Gr43-like clade (Fig 2). This study demonstrated that TcGr20 is a  
391 mannitol/sorbitol receptor, but the functions of other *TcGr21-28* genes remain unclear.  
392 These include *TcGr25* and *26*, for which we failed to amplify PCR products from any cDNAs.  
393 The six *TcGr* genes would allow *T. castaneum*, as a generalist feeder, to be capable of

394 recognizing a large number of natural attractants such fructose and sugar alcohols. Since  
395 these *TcGr* genes were highly expressed in the antennae, contributing to the beetles'  
396 ground-dwelling life style and scanning behavior [15], they may respond to non-volatile  
397 stimuli produced by host plants. As alternative candidate targets, we expected that  
398 compounds produced by fungi would be attractive, since beetles were strongly attracted  
399 to chemical stimuli from fungi grown on flour and cotton seeds [30–33]. When the beetle  
400 larvae fed on *Aspergillus niger*, suitable development occurred and the reproductive  
401 potential of the females eventually increased (30-32).

402 Mannitol, the most widely distributed of the polyols, is found in more than 50  
403 species of plants, algae, fungi, and lichens [34, 35]. In particular, dried seaweeds contain  
404 1–1.7 M mannitol as a major carbohydrate component [36]. Sorbitol is also present in  
405 prunes at 2.4 g/100 g dry weight and pears at 4.6 g/100 g dry weight [37]. *T. castaneum*  
406 would recognize these stored foods because sugar alcohols are present at much higher  
407 concentrations than are responded to by TcGr20. *A. niger* produces 45-210 mM mannitol  
408 [38], implying that *T. castaneum* can recognize the fungi themselves using TcGr20. Fungal  
409 growth is favored in high-moisture conditions in stored products and bulk grains. It is

410 possible *T. castaneum* may be drawn to such stored products using such fungal attractants  
411 as a cue. *T. castaneum* is also a harmful wheat flour pest [12, 39], attacking cake flour and  
412 whole-wheat flour containing around 0.032 mg/g and 0.01 mg/g dry weight  
413 mannitol/flour, respectively (S4 Table), which are levels far lower than biochemically  
414 required for TcGr20 recognition. Therefore, *T. castaneum* adults are unlikely to recognize  
415 wheat flour using TcGr20. Rather, they more likely recognize sugars such as glucose and  
416 fructose contained in the wheat flour. Our TribUTE assay demonstrated that adult beetles  
417 could, to some degree, recognize some sugars such as fructose, glucose, maltose, and  
418 trehalose (Fig 1D). Based on these findings, we suggest that TcGr5 in the sugar clade [15]  
419 are potential candidates for recognition of these carbohydrates contained in wheat flour.

420 A novel artificial dietary method for *T. castaneum* adult beetles facilitates  
421 examination of their dietary intake based on the eventual measurement of amount of  
422 excreta. Gypsum, or calcium sulfate dihydrate, is an inorganic compound, formed into a  
423 solid in combination with water (PubChem database, CID: 24928). The observation of  
424 gypsum intake by *T. castaneum* demonstrated a series of behaviors from recognition and  
425 swallowing to excretion. The TribUTE assay can quantify beetle preferences for

426 non-volatile compounds by measuring gypsum excreta without consideration of odorant  
427 stimulation. Sugars/sugar alcohols act as feeding behavior-facilitating factors in some  
428 insects [40–42], and *T. castaneum* significantly preferred gypsum containing these  
429 additives (Fig 1D). The TribUTE assay enabled the identification of non-volatile  
430 compounds associated with the food preference of *T. castaneum*. Notably, adult beetles  
431 can feed on gypsum without sweeteners (Fig 1). Thus, the TribUTE assay would be also  
432 applicable for the exploring non-volatile compounds that induce a decrease in dietary  
433 intake by *T. castaneum*. Such compounds would be useful in controlling *T. castaneum* in  
434 the future.

435

436

#### 437 **Author contributions**

438 TT, SK conceived and designed the experiments; TT, SK performed the experiments; TT,  
439 RS, SK analyzed data; TT SK contributed reagents/materials/analysis tools; TT, SK wrote  
440 the paper.

441

442 **Conflicts of interest**

443 The authors declare no competing financial interests.

444

445 **Acknowledgements**

446 We would like to thank Dr. Takumi Kayukawa at Institute of Agrobiological Sciences NARO

447 (Ibaraki, Japan) for advice of *T. castaneum* maintenance. We appreciate to Dr. Takeshi

448 Suzuki at Tokyo University of Agriculture and Technology for the quantifications of DNA

449 and RNA.

450

451

452 **Reference**

453 1. Devitt BD, Smith JJB. Action of mouthparts during feeding in the dark-sided cutworm,

454 *Euxoa messoria* (Lepidoptera, Noctuidae). Can Entomol. 1985;117:343–349.

455

456 2. Moon SJ, Köttgen M, Jiao Y, Xu H, Montell C. A taste receptor required for the caffeine

457 response in vivo. Curr Biol. 2006;16:1812–1817.

458

459 3. Dus M, Min S, Keene AC, Lee GY, Suh GS. Taste-independent detection of the caloric  
460 content of sugar in *Drosophila*. *Proc Natl Acad Sci U S A*. 2011;108:11644–11649.

461

462 4. Dahanukar A, Foster K, van der Goes van Naters WM, Carlson JR. A Gr receptor is  
463 required for response to the sugar trehalose in taste neurons of *Drosophila*. *Nat Neurosci*.  
464 2001;4:1182–1186. PMID: 11704765.

465

466 5. Isono K, Morita H. Molecular and cellular designs of insect taste receptor system. *Front*  
467 *Cell Neurosci*. 2010;4:20. PubMed PMID: 20617187.

468

469 6. Bernays EA, Minkenbergh OPJM. Insect herbivores: different reasons for being a  
470 generalist. *Ecology*. 1997;78:1157–1169.

471

472 7. Ito T. Effect of sugars on feeding of larvae of the silkworm *Bombyx mori*. *J Insect Physiol*.  
473 1960;5:95–107.

474

475 8. Ishikawa S, Hirao T, Arai, N. Chemosensory basis of hostplant selection in the silkworm.

476 Entomol Exp Appl. 1969;12:544–554.

477

478 9. Kikuta S, Endo H, Tomita N, Takada T, Morita C, Asaoka K, et al. Characterization of a

479 ligand-gated cation channel based on an inositol receptor in the silkworm, *Bombyx mori*.

480 Insect Biochem Mol Biol. 2016;74:12–20.

481

482 10. Xu W, Papanicolaou A, Zhang HJ, Anderson A. Expansion of a bitter taste receptor

483 family in a polyphagous insect herbivore. Sci Rep. 2016;6:23666. doi: 10.1038/srep23666.

484 PubMed PMID: 27032373.

485

486 11. Jiang XJ, Ning C, Guo H, Jia YY, Huang LQ, Qu MJ, Wang CZ. A gustatory receptor tuned

487 to d-fructose in antennal sensilla chaetica of *Helicoverpa armigera*. Insect Biochem Mol

488 Biol. 2015;60:39–46.

489

- 490 12. LeCato GL. Red flour beetle: population growth on diet of corn, wheat rice or shelled  
491 peanuts supplemented with eggs or adult of the Indian meal moth. J Econ Entomol.  
492 1975;68:763–765.  
493
- 494 13. Hamed M, Khattak SU. Red flour beetle development and losses in various stored  
495 foodstuffs. Sarhad J Agric. 1985;1:97–101.  
496
- 497 14. Kim HS, Murphy T, Xia J, Caragea D, Park Y, Beeman RW, et al. BeetleBase in 2010:  
498 revisions to provide comprehensive genomic information for *Tribolium castaneum*.  
499 Nucleic Acids Res. 2010;38:D437–42.  
500
- 501 15. Dippel S, Kollmann M, Oberhofer G, Montino A, Knoll C, Krala M, et al. Morphological  
502 and Transcriptomic Analysis of a Beetle Chemosensory System Reveals a Gnathal  
503 Olfactory Center. BMC Biol. 2016;14:90.  
504



- 505 16. Krishna SS, Saxena KN. Feeding response of adult *Tribolium* to carbohydrates in  
506 relation to their utilization. Cell Mol Life Sci. 1963;19:23.  
507
- 508 17. Xie YS, Bodnaryk RP, Fields PG. A rapid and simple flour-disk bioassay for testing  
509 substances active against stored-product insects. Can Entomol. 1996;128:865–875.  
510
- 511 18. Ja WW, Carvalho GB, Mak EM, de la Rosa NN, Fang AY, Liang JC, et al. Prandiology of  
512 *Drosophila* and the CAFE assay. Proc Natl Acad Sci U S A. 2007;104:8253–8256. PubMed  
513 PMID: 17494737  
514
- 515 19. Niu Y, Hardy G, Agarwal M, Hua L, Ren Y. Characterization of volatiles *Tribolium*  
516 *castaneum* (H.) in flour using solid phase microextraction–gas chromatography mass  
517 spectrometry (SPME–GCMS). Food Sci Hum Wellness. 2016;5:24–29.  
518
- 519 20. Sato K, Tanaka K, Touhara K. Sugar-regulated cation channel formed by an insect  
520 gustatory receptor. Proc Natl Acad Sci U S A. 2011;108:11680–11685.

521

522 21. Lord JC, Hartzler K, Toutges M, Oppert B. Evaluation of quantitative PCR reference

523 genes for gene expression studies in *Tribolium castaneum* after fungal challenge. J

524 Microbiol Methods. 2010;80:219–21. PubMed PMID: 20026205.

525

526 22. Sang W, He L, Wang XP, Zhu-Salzman K, Lei CL. Evaluation of Reference Genes for

527 RT-qPCR in *Tribolium castaneum* (Coleoptera: Tenebrionidae) Under UVB Stress. Environ

528 Entomol. 2015;44:418–25. PubMed PMID: 26313197.

529

530 23. Kikawada T, Saito A, Kanamori Y, Nakahara Y, Iwata K, Tanaka D, et al. Trehalose

531 transporter 1, a facilitated and high-capacity trehalose transporter, allows exogenous

532 trehalose uptake into cells. Proc Natl Acad Sci U S A. 2007;104:11585–11590. PubMed

533 PMID: 17606922

534

535 24. Grembecka M. Sugar alcohols—their role in the modern world of sweeteners: a review.

536 Eur Food Res Technol. 2015;241:1–14.

537

538 25. Abdel-Latif M. A family of chemoreceptors in *Tribolium castaneum* (Tenebrionidae:  
539 Coleoptera). PLoS ONE. 2007;2:e1319.

540

541 26. Miller SC, Miyata K, Brown SJ, Tomoyasu Y. Dissecting systemic RNA interference in the  
542 red flour beetle *Tribolium castaneum*: parameters affecting the efficiency of RNAi. PLoS  
543 ONE. 2012;7:e47431. PubMed PMID: 23133513.

544

545 27. Alabi T, Marion-Poll F, Danho M, Mazzucchelli GD, De Pauw E, Haubruge E, Francis F.  
546 Identification of taste receptors and proteomic characterization of the antenna and legs of  
547 *Tribolium brevicornis*, a stored food product pest. Insect Mol Biol. 2014;23:1–12.

548

549 28. Briscoe AD, Macias-Muñoz A, Kozak KM, Walters JR, Yuan F, Jamie GA, Martin SH,  
550 Dasmahapatra KK, Ferguson LC, Mallet J, Jacquin-Joly E, Jiggins CD. Female behaviour  
551 drives expression and evolution of gustatory receptors in butterflies. PLoS Genet.  
552 2013;9:e1003620. PubMed PMID: 23950722.

553

554 29. Devi MB, Devi NV, Biology of Rust-Red Flour Beetle, *Tribolium castaneum* (Herbst)

555 (Coleoptera: Tenebrionidae). Biological Forum – An Int J. 2015;7:12–15.

556

557 30. Mills JT. Insect fungus associations seed deterioration. Phytopatol. 1983;73:330–335.

558

559 31. Wright VF, Burroughs R. Mold-damaged grain sorghum as a diet for three stored-grain

560 beetles (Coleoptera). Envir Entomol. 1983;12:558–560.

561

562 32. Ahmad F, Daglish GJ, Ridley AW, Walter GH. Responses of *Tribolium castaneum* to

563 olfactory cues from cotton seeds, the fungi associated with cotton seeds, and cereals.

564 Entomol Exp Appl. 2012;145:272–281.

565

566 33. Starratt AN, Loschiavo SR. Aggregation of the confused flour beetle, *Tribolium*

567 *confusum*, elicited by mycelial constituents of the fungus *Nigrospora sphaerica*. J Insect

568 Physiol. 1971;17:407–414.

569

570 34. Lewis DH, Smith DC. Sugar alcohols (polyols) in fungi and green plants. I. Distribution,  
571 physiology and metabolism. *New Phytol.* 1967;66:143–184.

572

573 35. Meena M, Prasad V, Zehra A, Gupta VK, Upadhyay RS. Mannitol metabolism during  
574 pathogenic fungal-host interactions under stressed conditions. *Front Microbiol.*  
575 2015;6:1019.

576

577 36. Matsumura Y, Sato K, Al-saari N, Nakagawa S, Sawabe T. Enhanced hydrogen  
578 production by a newly described heterotrophic marine bacterium, *Vibrio tritonius* strain  
579 AM2, using seaweed as the feedstock. *Int J Hydrog Energy.* 2014;39:7270–7277.

580

581 37. Washuttl J, Riederer P, Bancher E. A Qualitative and Quantitative Study of  
582 Sugar-alcohols in Several Foods. *J Food Sci.* 1973;38:1262–1263.

583

- 584 38. Witteveen CF, Visser J. Polyol pools in *Aspergillus niger*. FEMS Microbiol Lett.  
585 1995;134:57–62. PubMed PMID: 8593956.
- 586
- 587 39. Tribolium Genome Sequencing Consortium. The genome of the model beetle and pest  
588 *Tribolium castaneum*. Nature. 2008;452:949–955. PubMed PMID: 18362917.
- 589
- 590 40. Ghaffar MB, Pritchard J, Ford-Lloyd B. Brown planthopper (*N. lugens* Stal) feeding  
591 behaviour on rice germplasm as an indicator of resistance. PLoS ONE. 2011;6:e22137.
- 592
- 593 41. Glendinning JI, Nelson NM, Bernays EA. How do inositol and glucose modulate feeding  
594 in *Manduca sexta* caterpillars? J Exp Biol. 2000;203:1299–1315.
- 595
- 596 42. Lushchak OV, Gospodaryov DV, Rovenko BM, Yurkevych IS, Perkhulyn NV, Lushchak VI.  
597 Specific dietary carbohydrates differentially influence the life span and fecundity of  
598 *Drosophila melanogaster*. J Gerontol A Biol Sci Med Sci. 2014;69:3–12. PubMed PMID:  
599 23723431.

600

601 43. Kumar S, Stecher G, Tamura K. MEGA7: Molecular Evolutionary Genetics Analysis

602 Version 7.0 for Bigger Datasets. Mol Biol Evol. 2016;33:1870-1874. PubMed PMID:

603 27004904.

604

605 44. Wanner KW, Robertson HM. The gustatory receptor family in the silkworm moth

606 *Bombyx mori* is characterized by a large expansion of a single lineage of putative bitter

607 receptors. Insect Mol Biol. 2008;17:621-629. PubMed PMID: 19133074.

608

## 609 **Supporting information**

610 **S1 Table. Primers for *Xenopus* oocyte expression**

611 **S2 Table. Primers for quantitative RT-PCR**

612 **S3 Table. Primers for double strand RNA synthesis**

613 **S4 Table. Mannitol in flours**

614 **S1 Fig. The BmGr10 response to *myo*-inositol as a positive control in a two-electrode**

615 **voltage clamp**

616 **S2 Fig. Current recordings of *Xenopus* oocytes expressing TcGr21, TcGr27 and**

617 **TcGr28 against sugars and sugar alcohols**

618 **S3 Fig. Gene silencing effect**

619 **S1 file. Quantification of mannitol content in wheat flours**

620



# 1 Fig

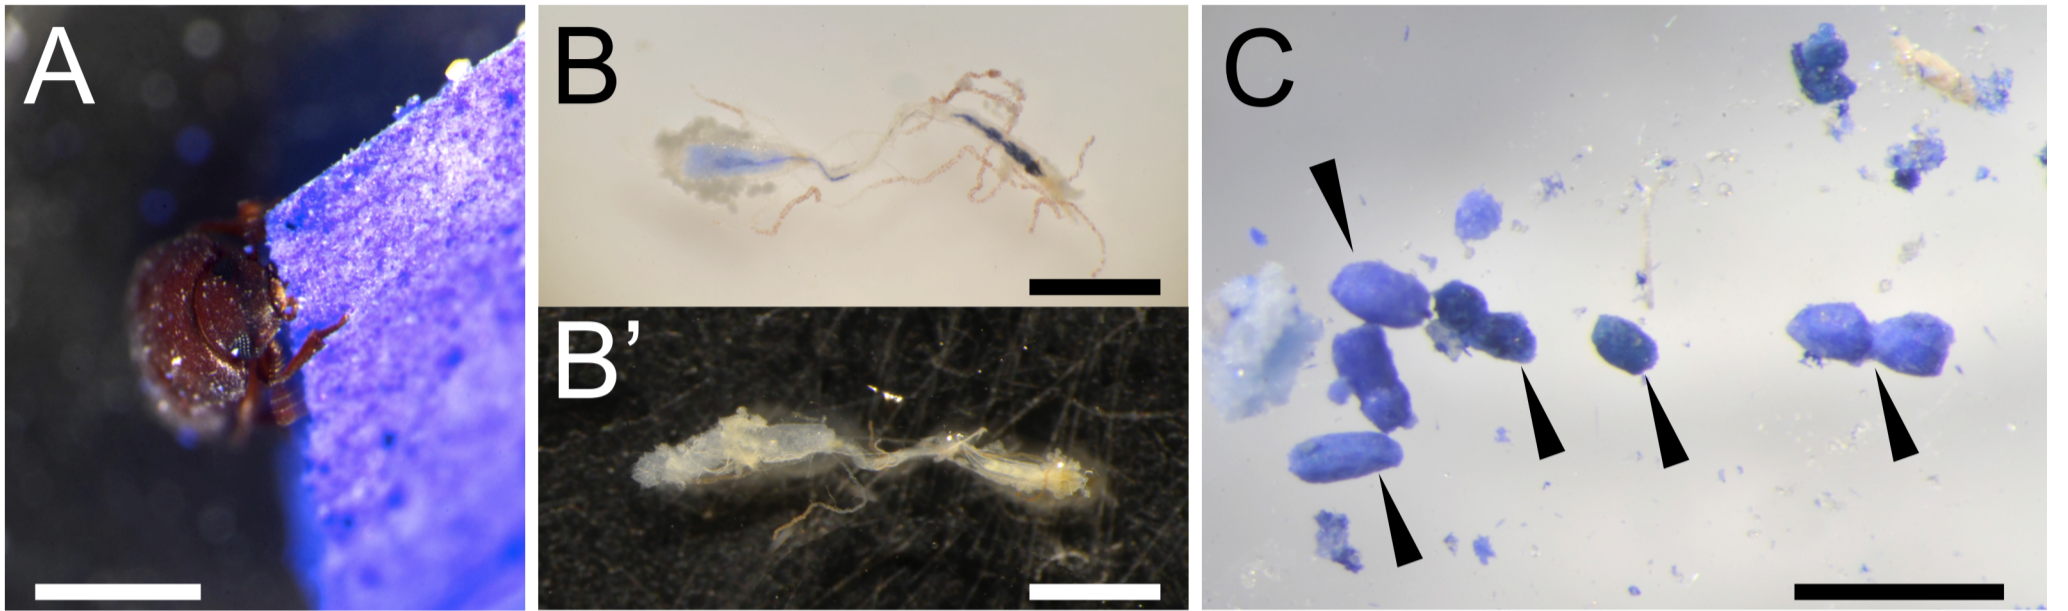

bioRxiv preprint doi: <https://doi.org/10.1101/157347>; this version posted June 29, 2017. The copyright holder for this preprint (which was not certified by peer review) is the author/funder, who has granted bioRxiv a license to display the preprint in perpetuity. It is made available under aCC-BY-NC-ND 4.0 International license.

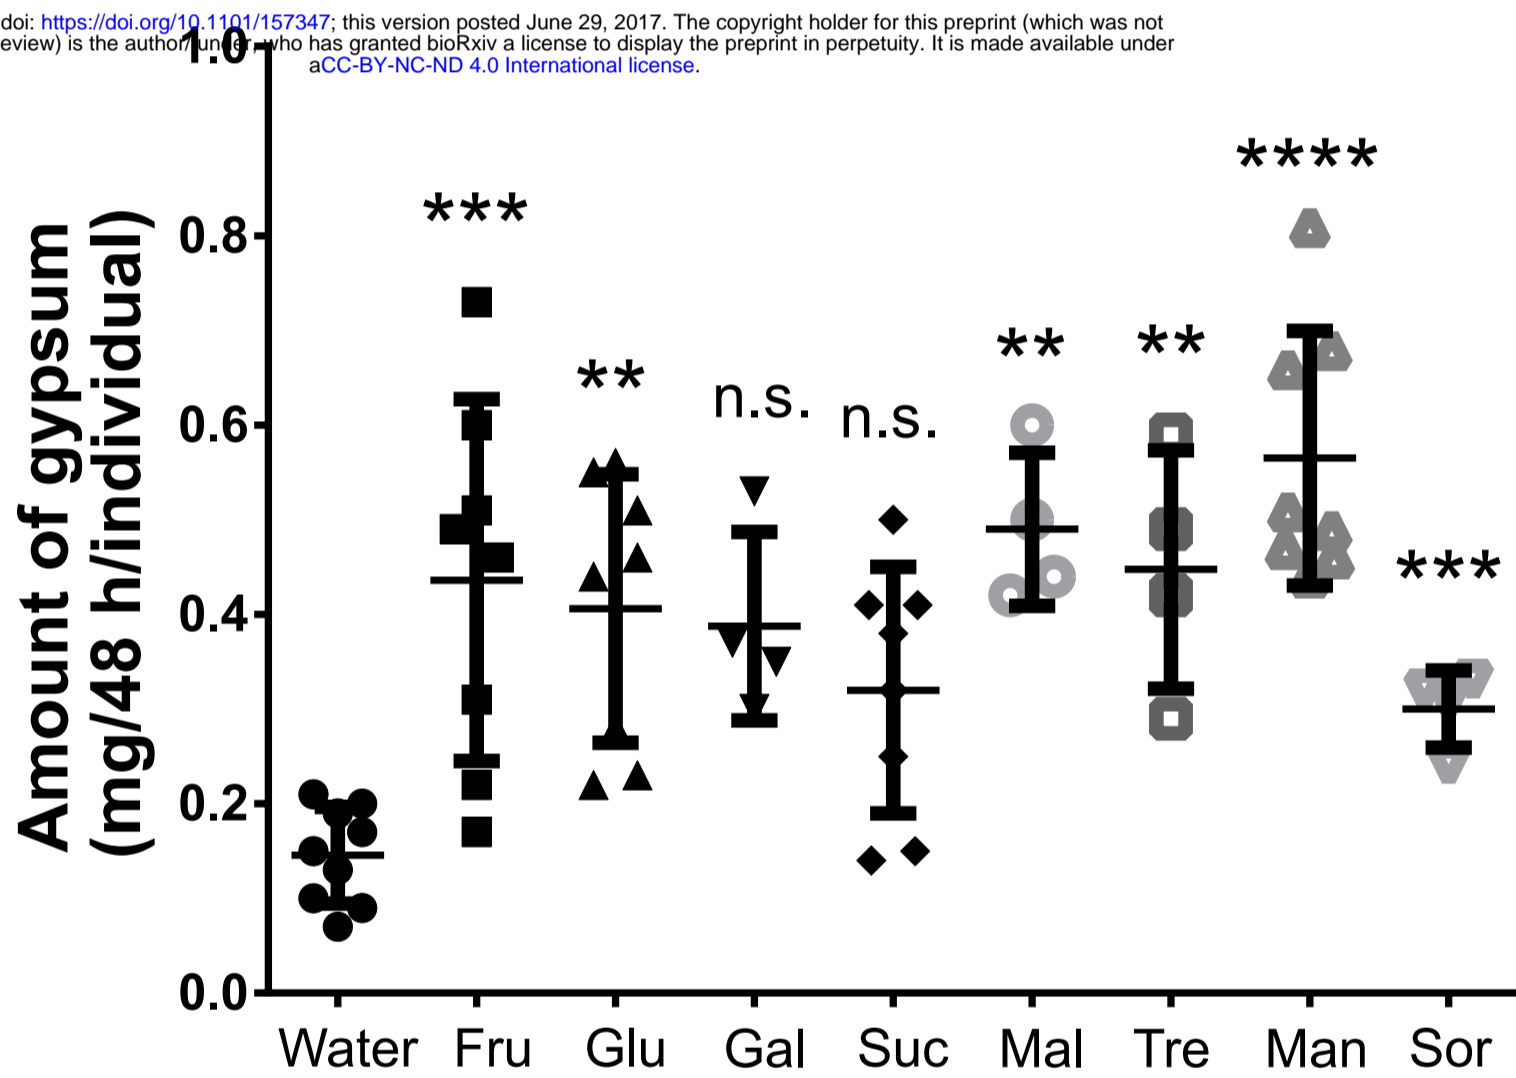

2 Fig

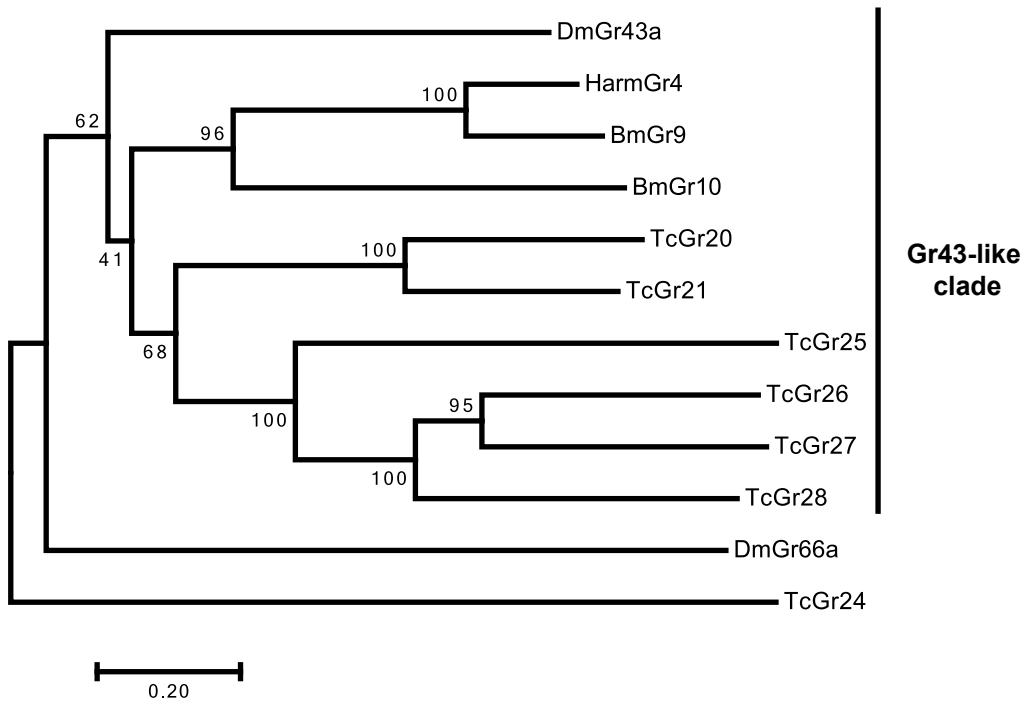

### 3 Fig

bioRxiv preprint doi: <https://doi.org/10.1101/157347>; this version posted June 29, 2017. The copyright holder for this preprint (which was not certified by peer review) is the author/funder, who has granted bioRxiv a license to display the preprint in perpetuity. It is made available under aCC-BY-NC-ND 4.0 International license.

# A

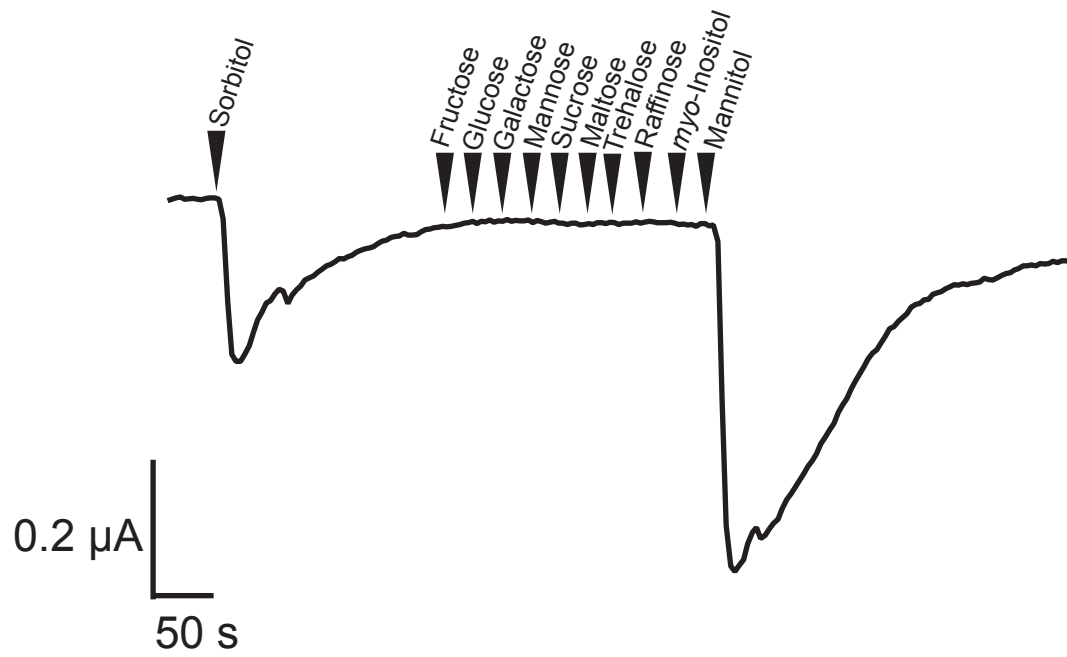

# B

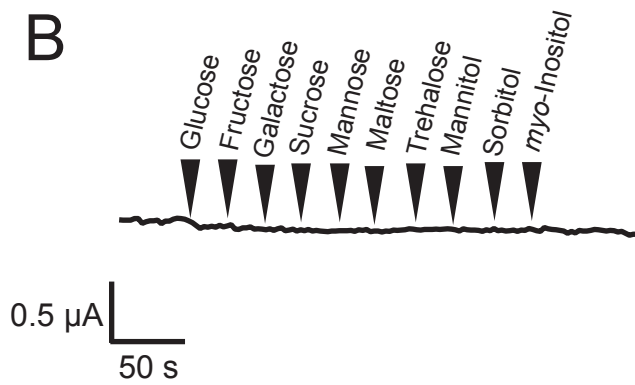

## 4 Fig

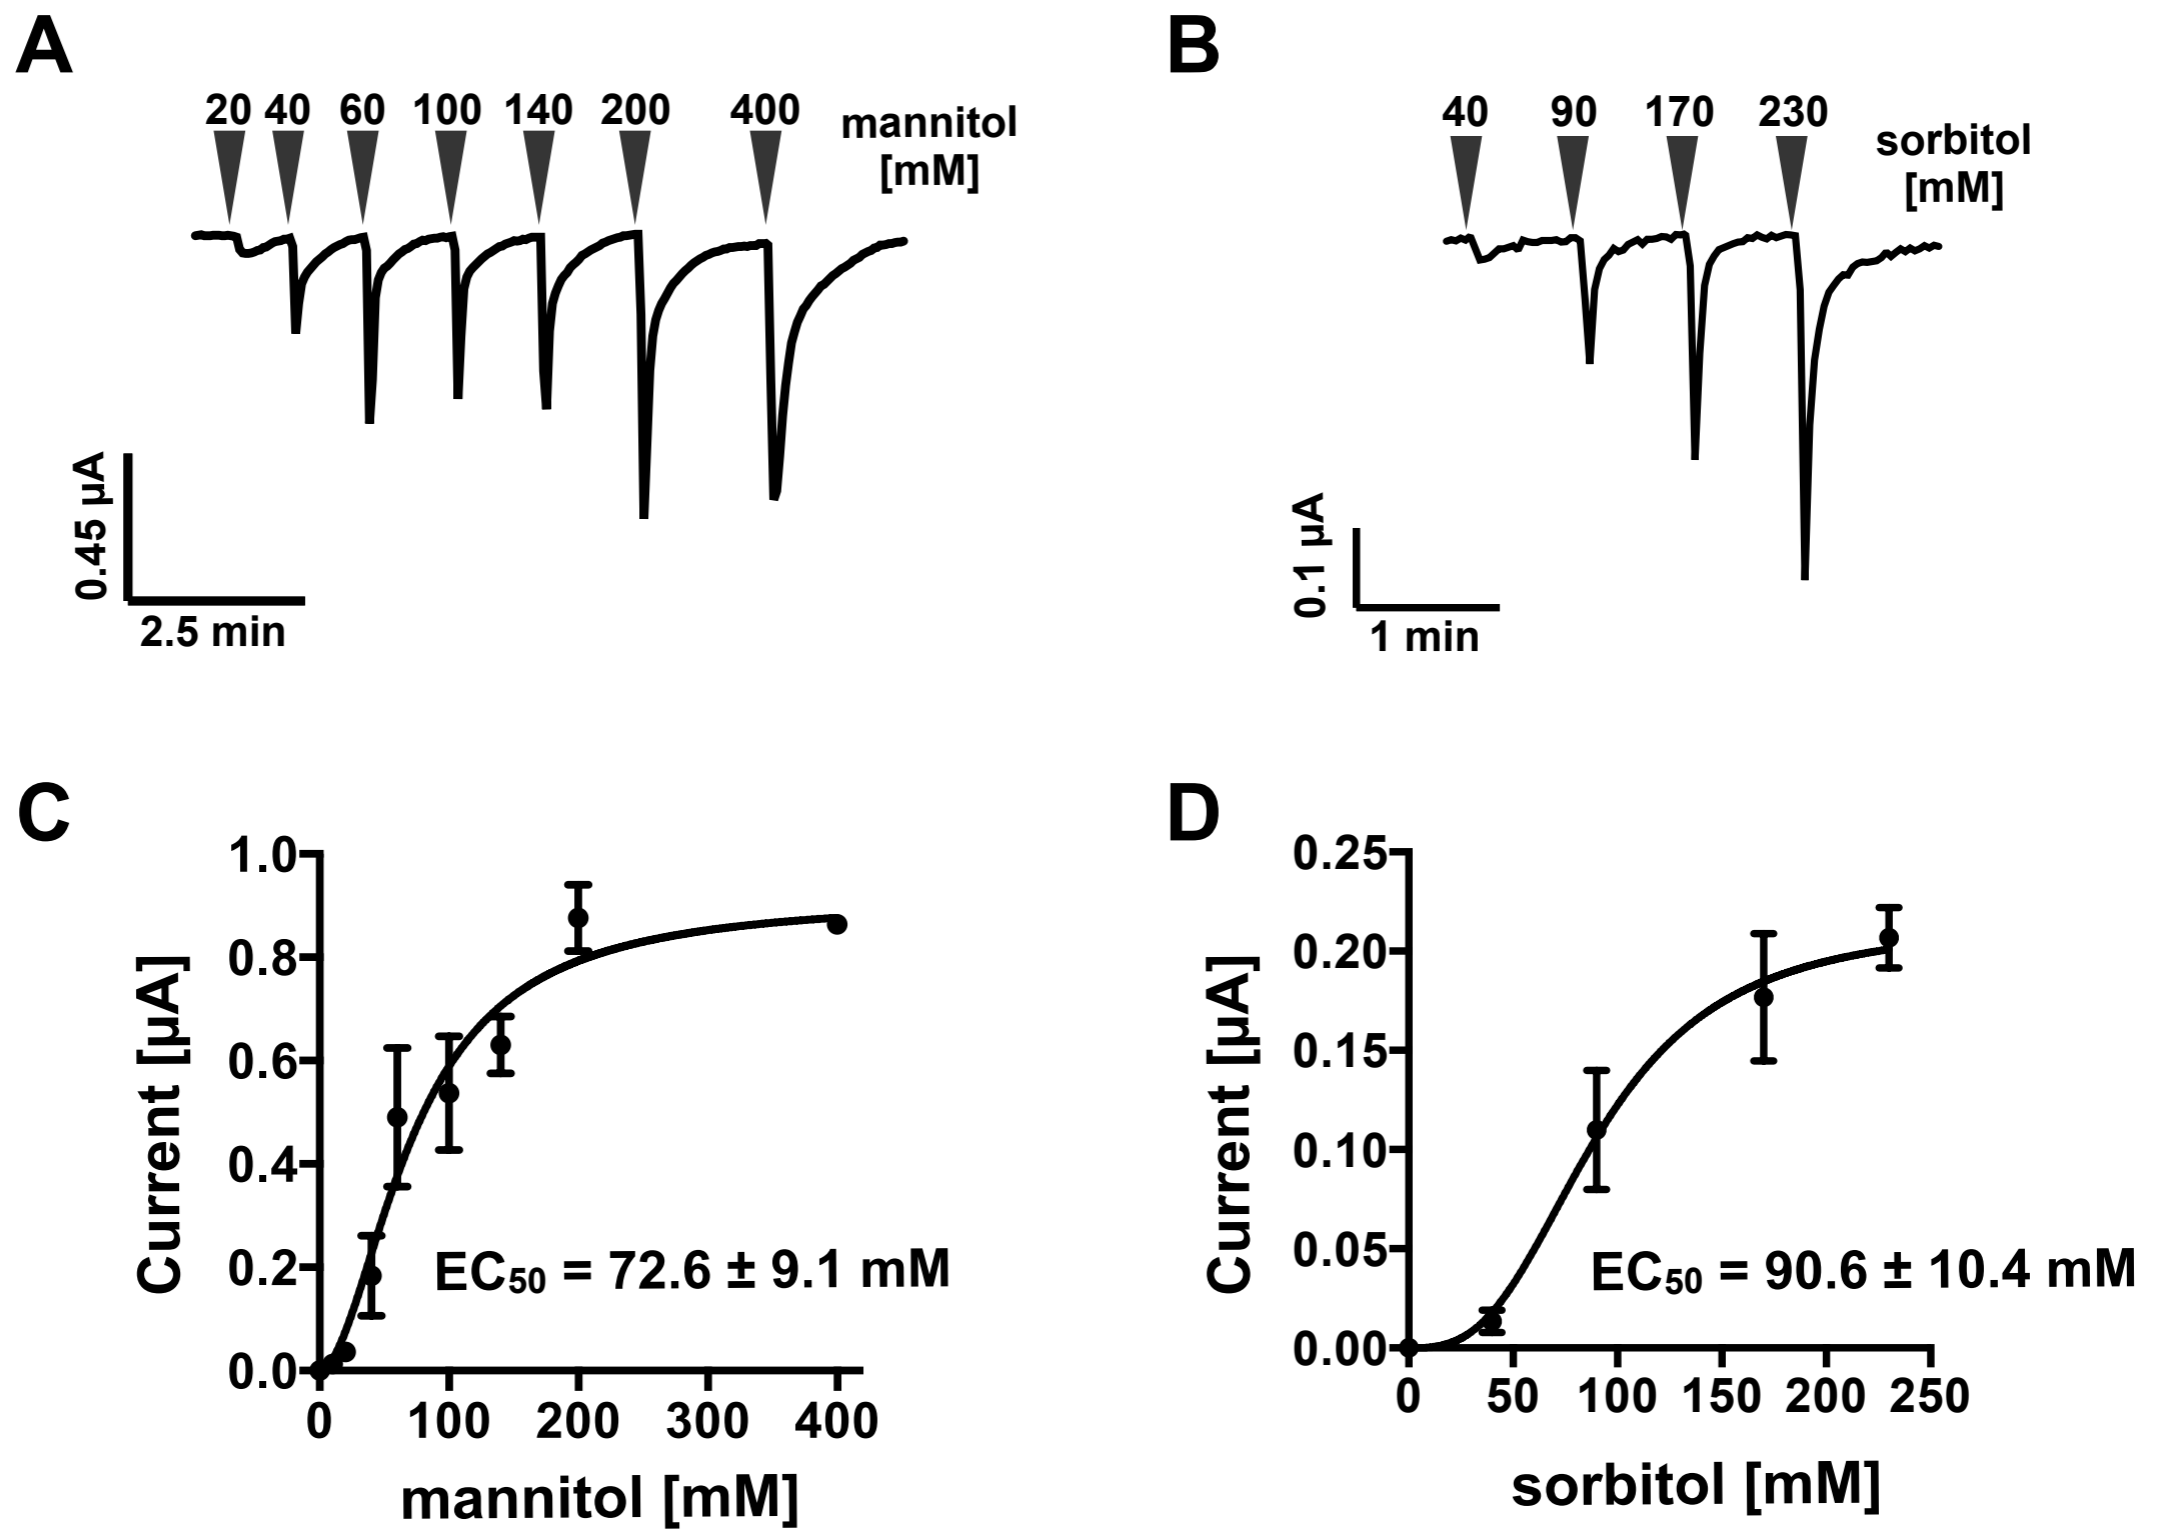

## 5 Fig

bioRxiv preprint doi: <https://doi.org/10.1101/157347>; this version posted June 29, 2017. The copyright holder for this preprint (which was not certified by peer review) is the author/funder, who has granted bioRxiv a license to display the preprint in perpetuity. It is made available under aCC-BY-NC-ND 4.0 International license.

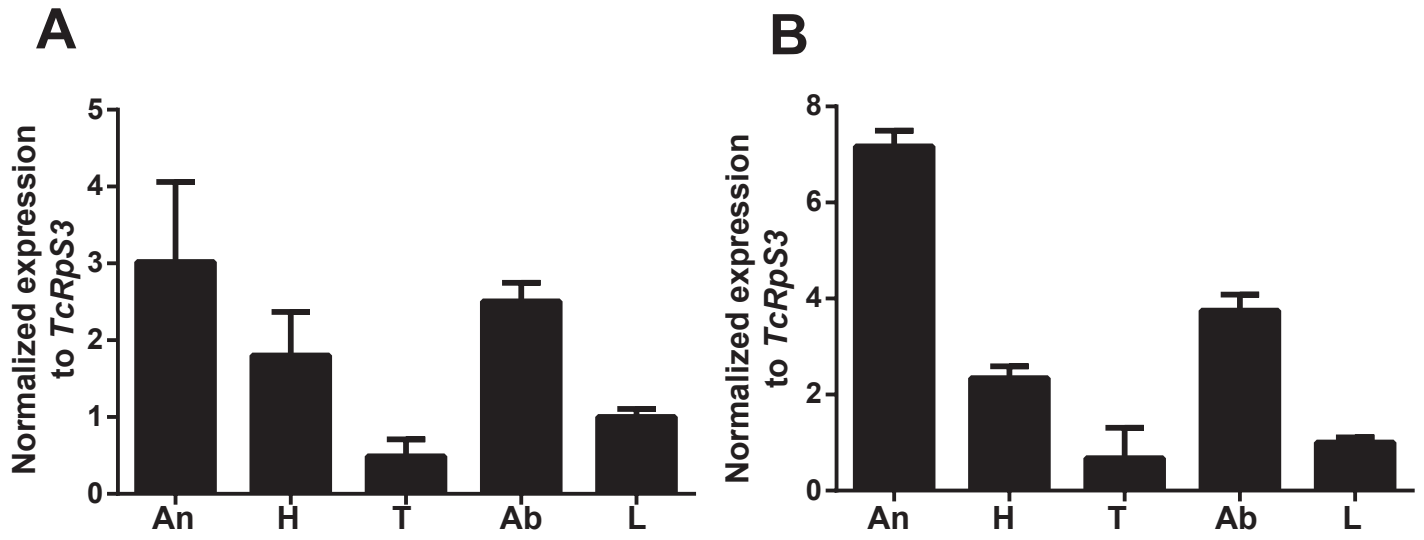

# 6 Fig

## A

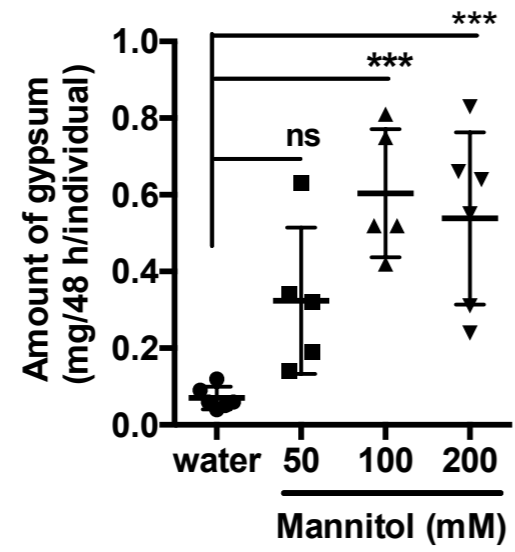

## B

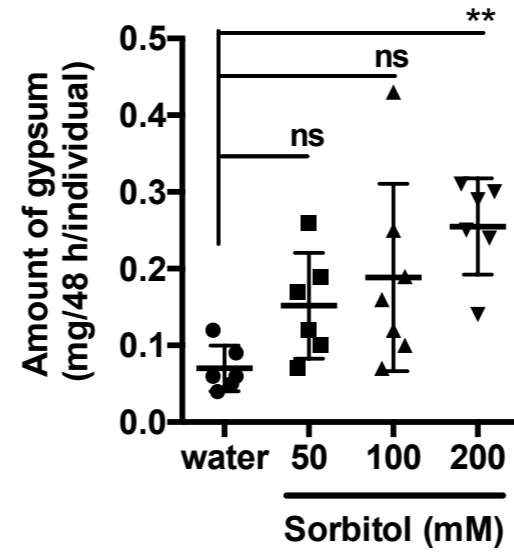

# 7 Fig

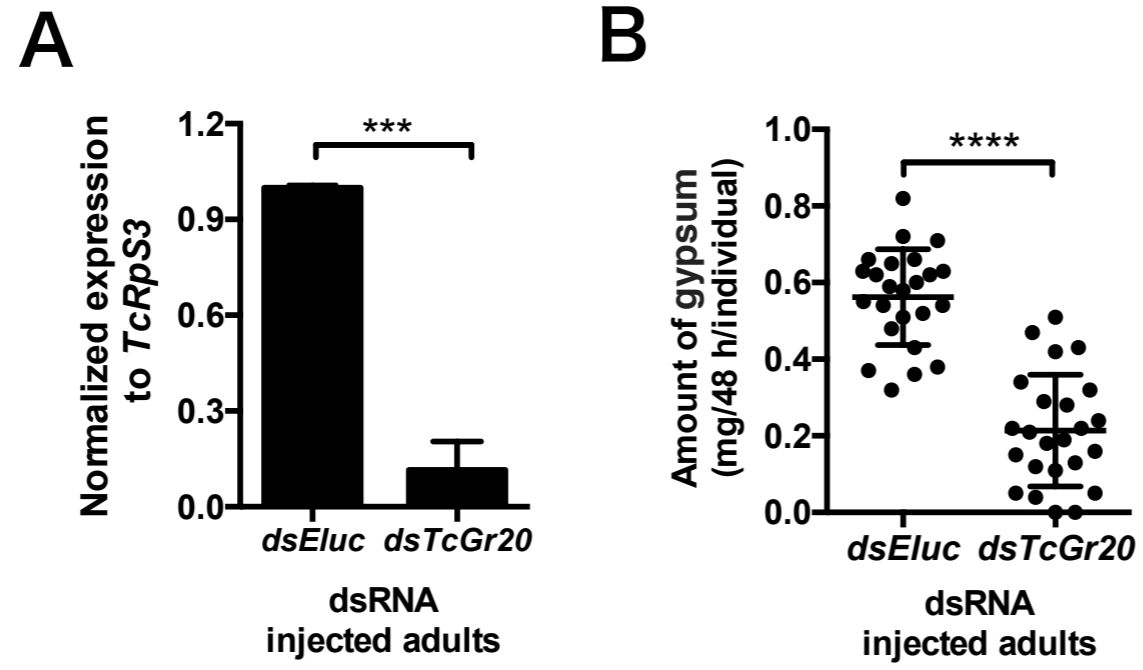

Source: https://www.biorxiv.org/content/10.1101/157347v1.full.pdf
